# Supplementary material for: Estimating disease incidence rates and transition probabilities in elderly patients using multi-state models: a case study in fragility fracture using a Bayesian approach
Source: Springer Nature journal article supplement (doi:10.1186/s12874-023-01859-y), 2023-02-14
Supplement: MOESM2 [file 24027174]

# Additional file 2: R code. JAGS model and estimation of cumulative incidences and transition probabilities.

## 1 Multi-state model JAGS

```
#MULTI-STATE MODEL JAGS

weib.ms.model<- "model{

#Total likelihood

  for(k in 1:n){

    #Hazard and log-survival functions
    #Transition 1,2
    base[1,2,k] <- lambda[1,2]*alpha[1,2]*pow(t[k,1],alpha[1,2]-1)
    elinpred[1,2,k] <- exp(inprod(beta[,1,2], X[k,]))
    h[1,2,k] <- base[1,2,k]*elinpred[1,2,k]
    logsurv[1,2,k]<- -lambda[1,2]*pow(t[k,1], alpha[1,2])*elinpred[1,2,k]

    #Transition 1,3
    base[1,3,k] <- lambda[1,3]*alpha[1,3]*pow(t[k,1],alpha[1,3]-1)
    elinpred[1,3,k] <- exp(inprod(beta[,1,3], X[k,]))
    h[1,3,k] <- base[1,3,k]*elinpred[1,3,k]
    logsurv[1,3,k]<- -lambda[1,3]*pow(t[k,1], alpha[1,3])*elinpred[1,3,k]

    #Definition of the log-likelihood using zeros trick
    trans12[k]<- c[k,1]*log(h[1,2,k])+logsurv[1,2,k]
    trans13[k]<- c[k,2]*log(h[1,3,k])+logsurv[1,3,k]
```

```

    phi[k] <- 100000-(trans12[k]+trans13[k]+trans23[k])
    zeros[k] ~dpois(phi[k])
}

#Likelihood for transition 2,3

for(j in fractals){

  base[2,3,j] <- lambda[2,3]*alpha[2,3]*pow(t[j,2]-t[j,1],alpha[2,3]-1)
  elinpred[2,3,j] <- exp(inprod(beta[,2,3], X[j,]))
  h[2,3,j] <- base[2,3,j]*elinpred[2,3,j]
  logsurv[2,3,j]<- -lambda[2,3]*pow(t[j,2]-t[j,1], alpha[2,3])*elinpred[2,3,j]

  trans23[j] <- c[j,3]*log(h[2,3,j])+logsurv[2,3,j]
}

for(p in nofracts){

  trans23[p]<- 0
}

#Prior distributions
for(l in 1:Nbetas){
  beta[l,1,2] ~dnorm(0,0.01)
  beta[l,1,3] ~dnorm(0,0.01)
  beta[l,2,3] ~dnorm(0,0.01)
}

lambda[1,2] ~ dgamma(0.01,0.01)
lambda[1,3] ~ dgamma(0.01,0.01)
lambda[2,3] ~ dgamma(0.01,0.01)

alpha[1,2] ~ dgamma(0.01,0.01)
alpha[1,3] ~ dgamma(0.01,0.01)
alpha[2,3] ~ dgamma(0.01,0.01)

}"

```

```

#MCMC SAMPLES (Paralleled)
#Data
d.jags <- list(n=nrow(X), t=time, X=X, c=c, zeros=rep(0,nrow(X)), Nbetas=ncol(X),
              frags=which(c[,1]==1), nofrags=which(c[,1]==0))
#Parameters
p.jags <- c("beta", "alpha", "lambda")

#Wrapper for parallelization
coda.samples.wrapper <- function(j)
{
  m1 = jags.model(data=d.jags, file=textConnection(weib.ms.model),
                 inits=list(.RNG.name="base::Wichmann-Hill", .RNG.seed=j),
                 n.chains=1)
  update(m1, 1000)
  coda.samples(m1, variable.names=p.jags, n.iter=10000, thin=1)
}

```

## 2 Cumulative incidences and transition probabilities

### 2.1 Cumulative incidence of refracture

```

#General notation. States: 1 fracture, 2 refracture, 3 death. Transitions:
#"12" transition from fracture to refracture, "13" transition from fracture
#to death, "23" transition from refracture to death.
#Regression coefficients: beta1 (sex) and beta2 (age) for each transition,
#e.g. beta112 effect of sex on risk of refracture (transition 12).

```

```

cif1 <- function(t,x){

  media<- numeric(length(t))
  quantiles<- matrix(nrow=2,ncol=length(t))

  x[2]<- x[2]-mean(edad_i)

  exp12<- exp(x[1]*beta112+x[2]*beta212) #regression terms

```

```

exp13<- exp(x[1]*beta113+x[2]*beta213)

int<- numeric(length(alpha12)) #integral
ext<- lambda12*alpha12*exp12 #exterior part

for(i in 1:length(t)){ #for each given time

  for(j in 1:length(alpha12)){
    #for each sample from MCMC -> whole posterior distribution

    ff<-function(u){u^(alpha12[j]-1)*exp(-lambda12[j]*u^alpha12[j]*exp12[j]-
      lambda13[j]*u^alpha13[j]*exp13[j])}
    int[j]<-integrate(ff,0,t[i],rel.tol = 1e-8)[[1]]
  }

  media[i]<- mean(ext*int)
  quantiles[,i] <- quantile(ext*int, probs=c(0.025,0.975))

}

list(media,quantiles)
}

```

## 2.2 Cumulative incidence of death without refracture

```

cif2 <- function(t,x){

  media<- numeric(length(t))
  quantiles<- matrix(nrow=2,ncol=length(t))

  x[2]<- x[2]-mean(edad_i)

  exp12<- exp(x[1]*beta112+x[2]*beta212) #regression terms
  exp13<- exp(x[1]*beta113+x[2]*beta213)

  int<- numeric(length(alpha13)) #integral
  ext<- lambda13*alpha13*exp13 #exterior part

```

```

for(i in 1:length(t)){ #for each given time

  for(j in 1:length(alpha12)){
    #for each sample from MCMC -> whole posterior distribution

    ff<-function(u){u^(alpha13[j]-1)*exp(-lambda12[j]*u^alpha12[j]*exp12[j]-
                                             lambda13[j]*u^alpha13[j]*exp13[j])}
    int[j]<-integrate(ff,0,t[i],rel.tol = 1e-8)[[1]]
  }

  media[i]<- mean(ext*int)
  quantiles[,i] <- quantile(ext*int, probs=c(0.025,0.975))

}

list(media,quantiles)
}

```

### 2.3 Event-free probability, $p_{FF}(s,t)$

```

p11.func <- function(s,t,x){
  media<-numeric(length(t))
  quantiles<- matrix(nrow=2,ncol=length(t))

  x[2]<- x[2]-mean(edad_i)

  for(i in 1:length(t)){
    aux<- exp(-lambda12*(t[i]^alpha12-s^alpha12)*exp(x[1]*beta112+x[2]*beta212)-
              lambda13*(t[i]^alpha13-s^alpha13)*exp(x[1]*beta113+x[2]*beta213))

    media[i]<-mean(aux)
    quantiles[,i] <- quantile(aux, probs=c(0.025,0.975))
  }

  list(media, quantiles)
}

```

## 2.4 Transition probability from fracture to refracture, $p_{FR}(s,t)$

```
p12.func <- function(s,t,x){  
  
  media<- numeric(length(t))  
  quantiles<- matrix(nrow=2,ncol=length(t))  
  
  x[2]<- x[2]-mean(edad_i)  
  
  exp12<-exp(x[1]*beta112+x[2]*beta212)  
  exp13<-exp(x[1]*beta113+x[2]*beta213)  
  exp23<-exp(x[1]*beta123+x[2]*beta223)  
  
  int<- numeric(length(alpha12))  
  ext<- lambda12*alpha12*exp12*exp(lambda12*s^alpha12*exp12+  
                                     lambda13*s^alpha13*exp13)  
  
  for(i in 1:length(t)){  
  
    for(j in 1:length(alpha12)){  
  
      ff<-function(u){  
        u^(alpha12[j]-1)*exp(-lambda12[j]*u^alpha12[j]*exp12[j]-  
                              lambda13[j]*u^alpha13[j]*exp13[j]-  
                              lambda23[j]*(t[i]-u)^alpha23[j]*exp23[j])  
      }  
      int[j]<-integrate(ff,s,t[i],rel.tol = 1e-8)[[1]]  
    }  
  
    media[i]<- mean(ext*int)  
    quantiles[,i] <- quantile(ext*int, probs=c(0.025,0.975))  
  }  
  
  list(media, quantiles)  
}
```

## 2.5 Transition probability from refracture to death, $p_{RD}(s,t | t_{FR})$

```
p23.func <- function(s,t,t12,x){  
  
  media<-numeric(length(t))  
  quantiles<- matrix(nrow=2,ncol=length(t))  
  
  x[2]<- x[2]-mean(edad_i)  
  
  #for each given time we calculate mean and credibility interval  
  for(i in 1:length(t)){  
    time.diff <- (t[i]-t12)^alpha23-(s-t12)^alpha23  
    aux<- 1-exp(-lambda23*time.diff*exp(x[1]*beta123+x[2]*beta223))  
    #aux contains the posterior distribution  
    media[i]<-mean(aux)  
    quantiles[,i] <- quantile(aux, probs=c(0.025,0.975))  
  }  
  
  list(media, quantiles)  
}
```

## 2.6 Transition probability from fracture to death, $p_{FD}(s,t)$

```
p13.func<- function(s,t,x){  
  
  media<- numeric(length(t))  
  quantiles<- matrix(nrow=2,ncol=length(t))  
  
  x[2]<- x[2]-mean(edad_i)  
  
  exp12<-exp(x[1]*beta112+x[2]*beta212)  
  exp13<-exp(x[1]*beta113+x[2]*beta213)  
  exp23<-exp(x[1]*beta123+x[2]*beta223)  
  
  int<- numeric(length(alpha12))  
  ext<- lambda12*alpha12*exp12*exp(lambda12*s^alpha12*exp12+  
                                     lambda13*s^alpha13*exp13)
```

```

for(i in 1:length(t)){
  p11<- exp(-lambda12*(t[i]^alpha12-s^alpha12)*exp12-
           lambda13*(t[i]^alpha13-s^alpha13)*exp13)

  for(j in 1:length(alpha12)){

    ff<-function(u){
      u^(alpha12[j]-1)*exp(-lambda12[j]*u^alpha12[j]*exp12[j]-
                          lambda13[j]*u^alpha13[j]*exp13[j]-
                          lambda23[j]*(t[i]-u)^alpha23[j]*exp23[j])}
    int[j]<-integrate(ff,s,t[i],rel.tol = 1e-8)[[1]]
  }
  aux<- 1-p11-int*ext #p13= 1-p11-p12
  media[i]<- mean(aux)
  quantiles[,i] <- quantile(aux, probs=c(0.025,0.975))

}

list(media,quantiles)
}

```
